# Supplementary material for: The structural basis of translational control by eIF2 phosphorylation
Source: PubMed Central journal article supplement (PMC6513899; doi:10.1038/s41467-019-10167-3), 2019-05-13
Supplement: 41467_2019_10167_MOESM1_ESM.pdf [file 41467_2019_10167_MOESM1_ESM.pdf]

Supplementary Material for:

# **The Structural Basis of Translational Control by eIF2 Phosphorylation**

Adomavicius et al.

This file contains:

Supplementary Figures 1-8

Supplementary Tables 1-5

Supplementary Discussion

Supplementary References

Note: Supplementary Movies 1 and 2 are provided as separate files

## Supplementary Figures

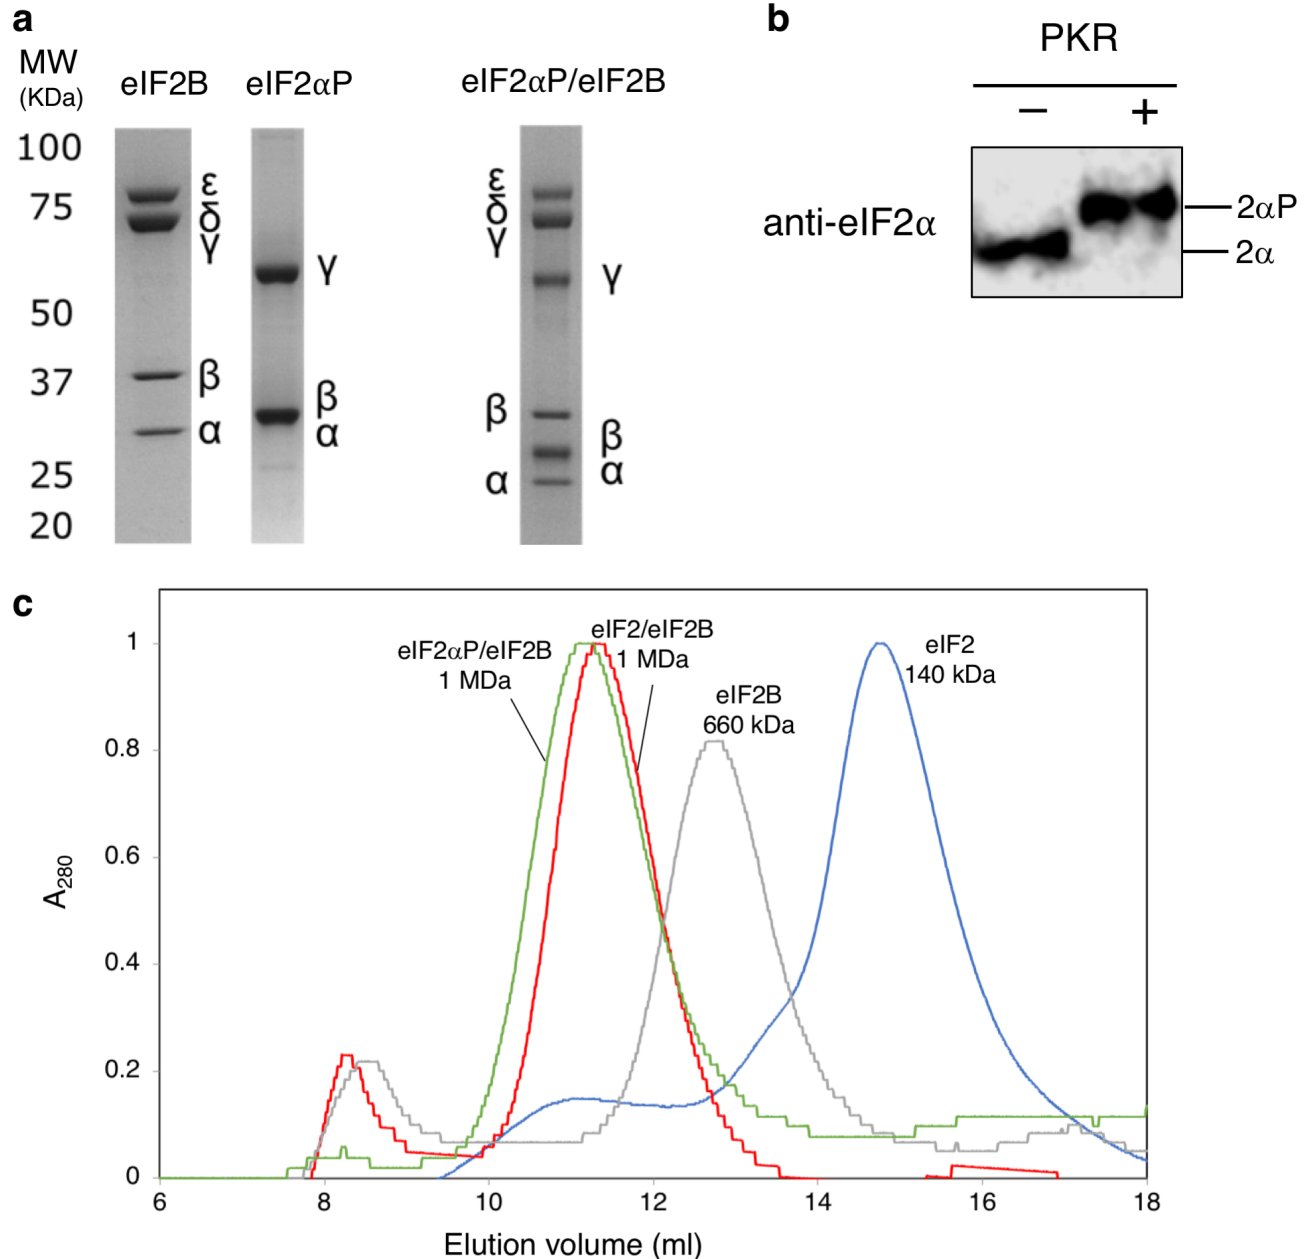

### Supplementary Figure 1. Purified eIF2B, eIF2 and eIF2 $\alpha$ P/eIF2B complexes

**a**, Coomassie blue stained SDS-PAGE of purified eIF2B, eIF2 as well as eIF2 $\alpha$ P/eIF2B complexes following SEC.

**b**, Phos-Tag western blot of eIF2 treated with PKR to quantitatively phosphorylate it prior to complex formation with eIF2B.

**c**, Example SEC-MALLS traces of indicated complexes with peak MWs.

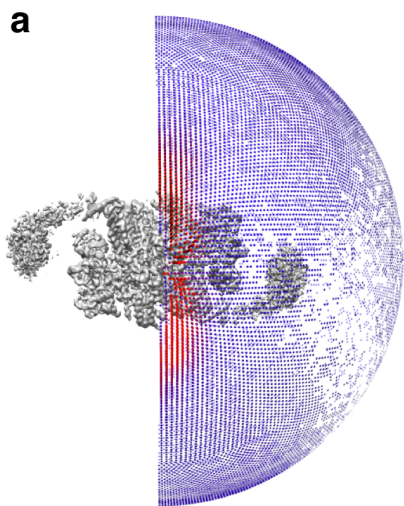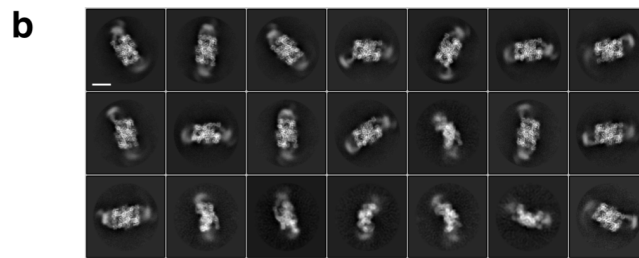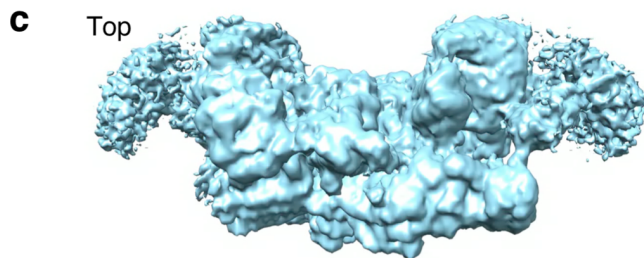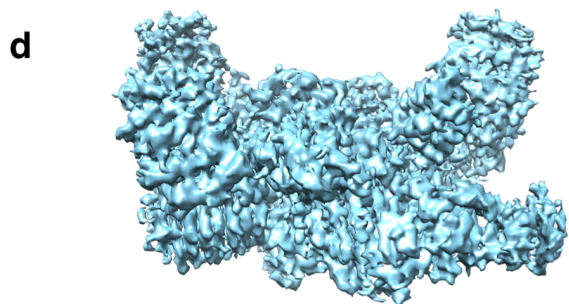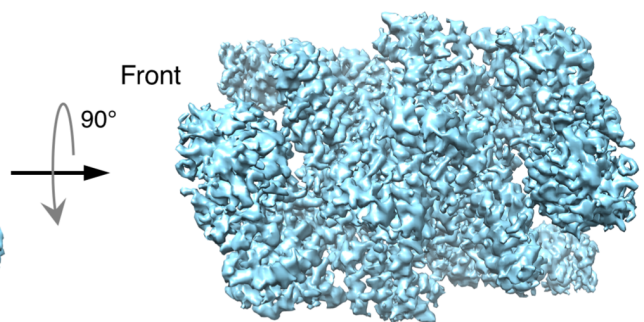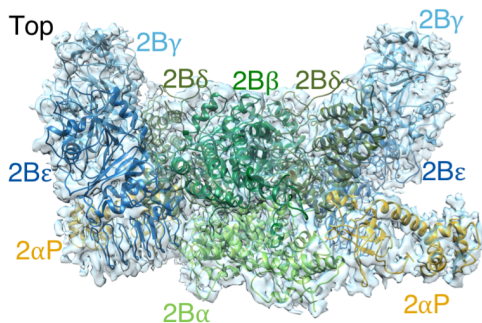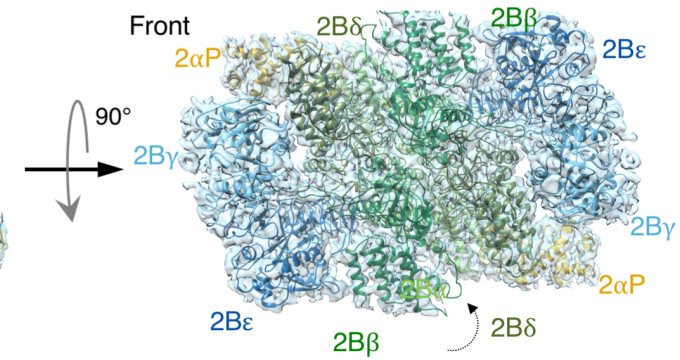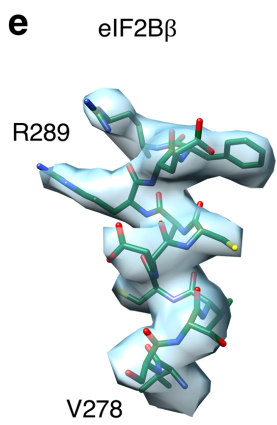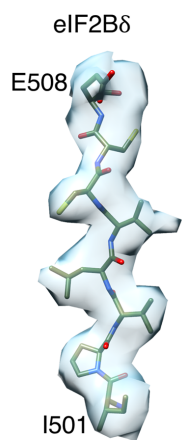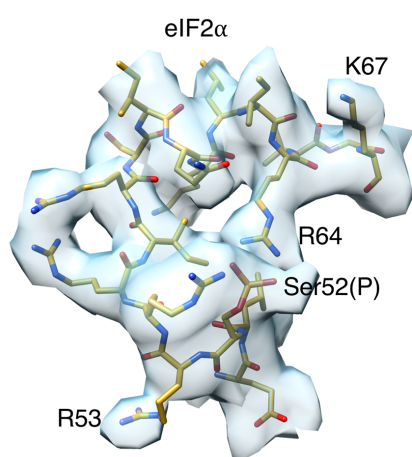



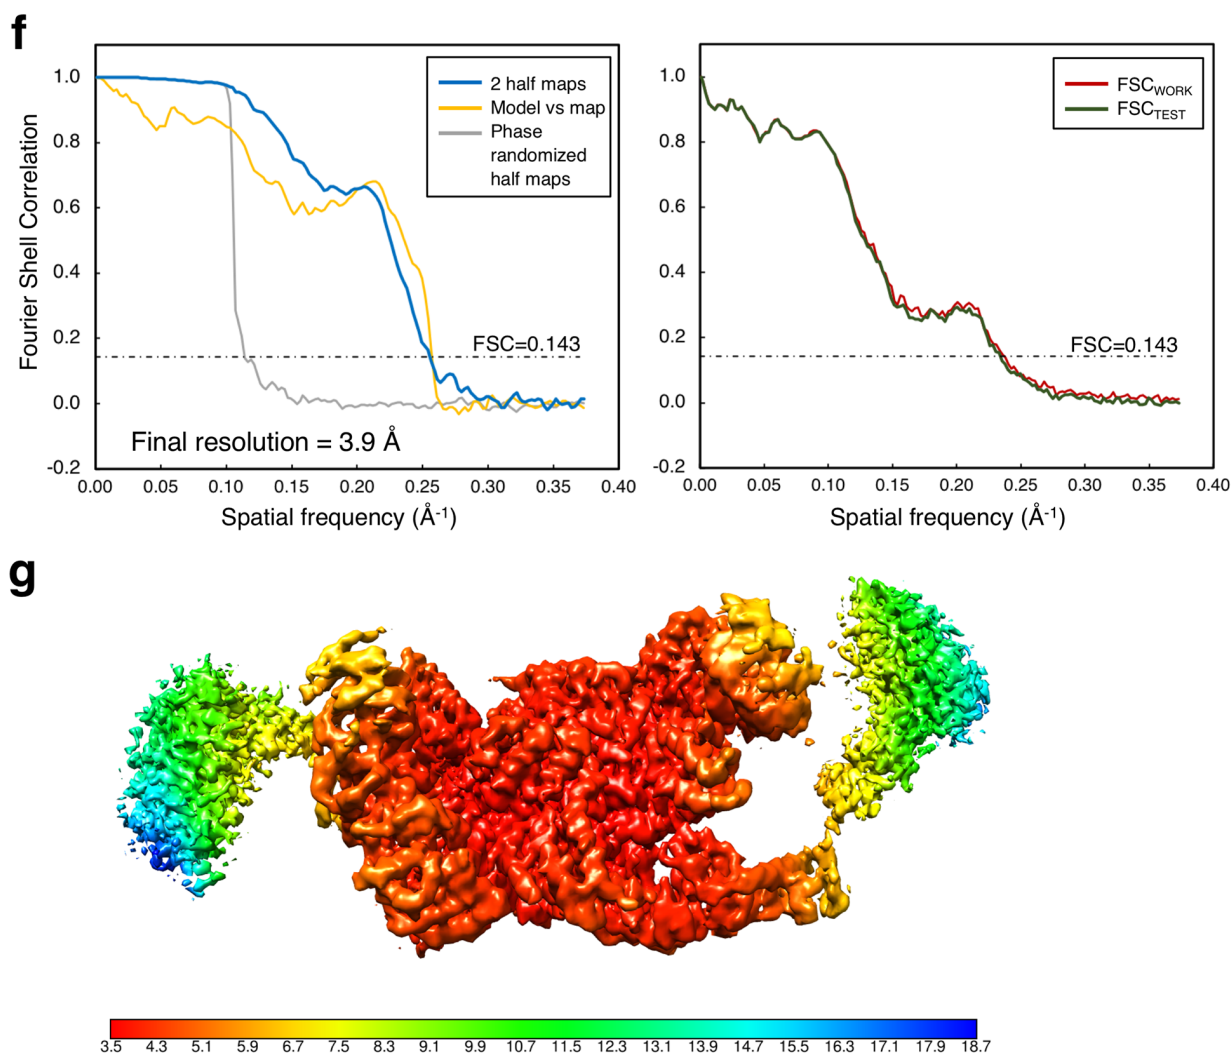

**Supplementary Figure 2. A Cryo EM structure of the eIF2B-eIF2(αP) complex**

**a**, Particle angle plot (Relion).

**b**, Representative 2D classes of eIF2αP/eIF2B. Scale bar is 100 Å.

**c**, Initial 3D map of the eIF2αP/eIF2B complex, top view. The length of the complex is ~280 Å. Though irregular in shape, it would be enclosed by a rectangular box of dimensions 280 x 120 x 120 Å.

**d**, refined 3.9 Å map of the core complex (top) and modelled densities comprising eIF2B $\alpha$ - $\epsilon$  decamer and two eIF2 $\alpha$ <sup>1-174</sup> monomers (bottom). Top and front views shown.

**e**, Representative regions of eIF2αP/eIF2B density depicted as transparent isosurface with atomic model fitted.

**f**, Fourier Shell correlation (FSC) plots. Left. FSC computed using the gold-standard method (reported resolution by FSC criterion 0.143), FSC of final atomic model vs EM map, and FSC of half maps from refined phase randomized images. Right. Cross-validation FSCs show the weight applied in the atomic model refinement avoids over fitting.

**g**, Local resolution of the map shown as a colored surface applied to the map with local density re-scaling (using Locscale). The scalebar shows the local resolution (Å).

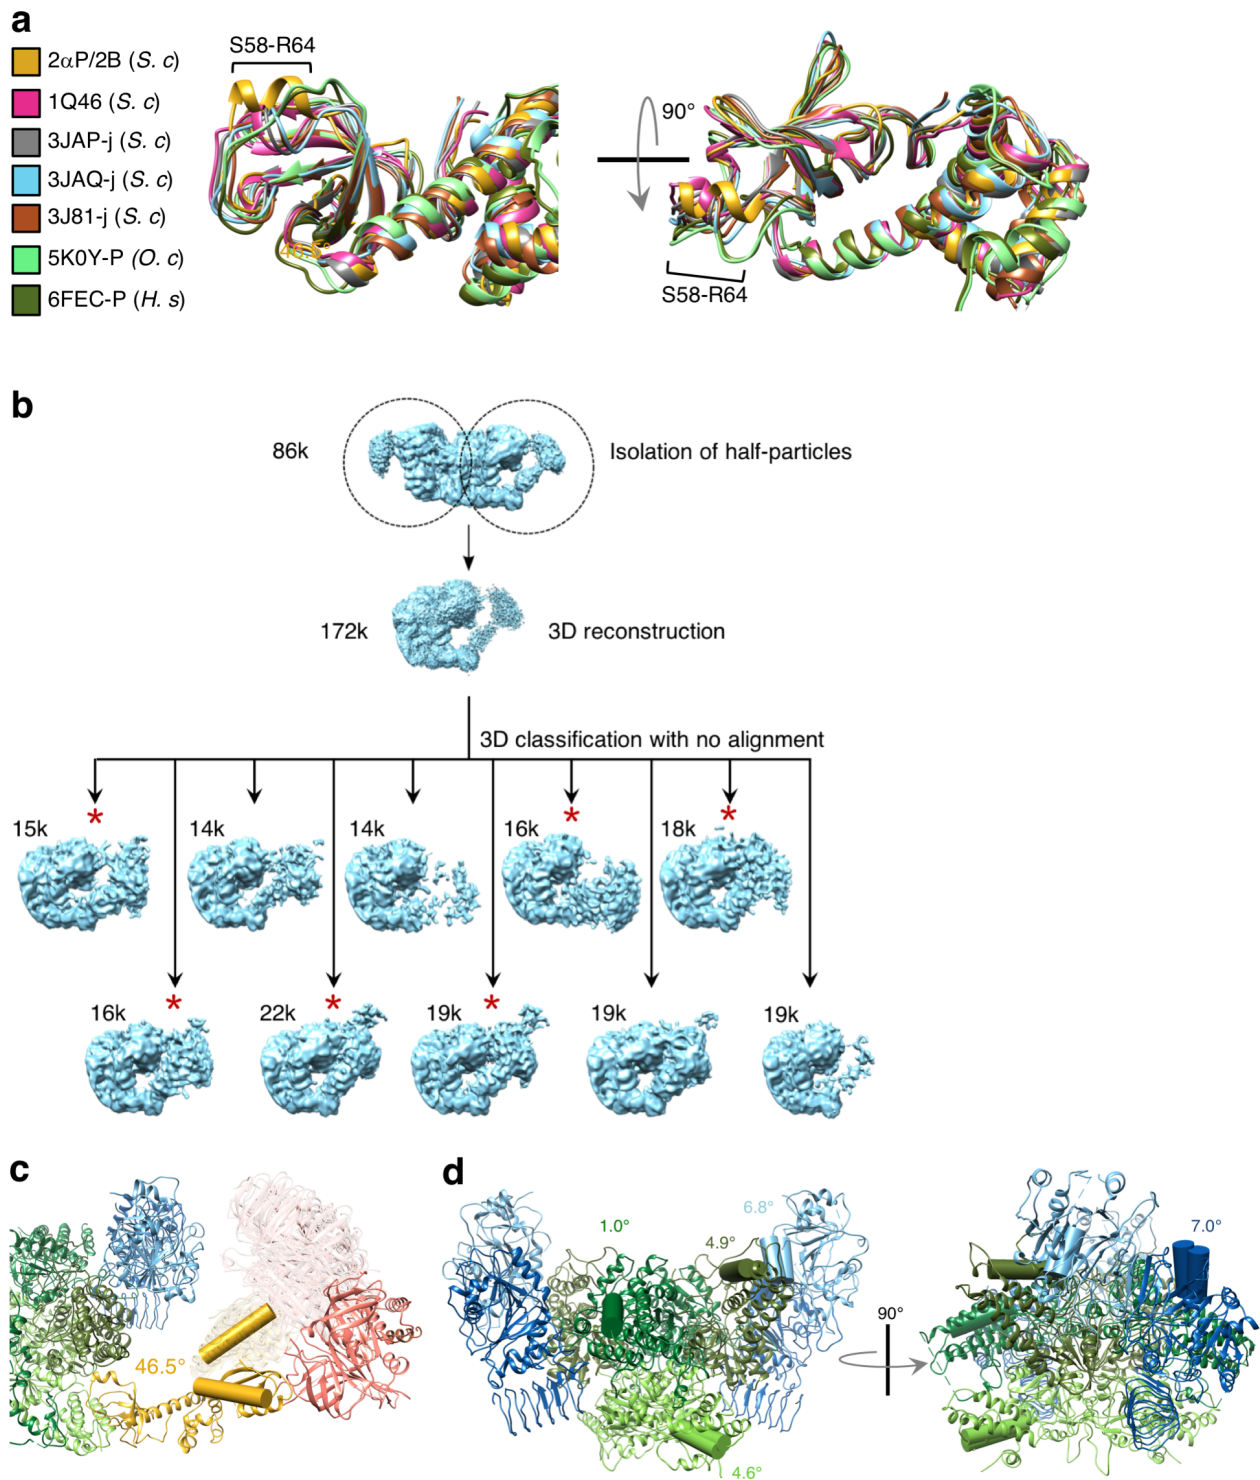

### Supplementary Figure 3. Angle differences in eIF2 $\alpha$ and eIF2B.

**a**, Alignment of eIF2 $\alpha$  from eIF2 $\alpha$ P/eIF2B with previous eIF2 $\alpha$  structures from yeast (*S. c*), rabbit (*O. c*) and human (*H. s*) with PDB accession codes. Secondary structures shown only.

**b**, Isolation and reclassification of eIF2 $\alpha$ P/eIF2B half particles into 10 classes(14-22,000 per class). Red asterisks denote subclasses used in Fig. 2 b-g.

**c**, Angle changes ( $^{\circ}$ ) observed in eIF2 $\alpha$  domain 3 and noted in Fig. 2.

**d**, Angle changes ( $^{\circ}$ ) observed in eIF2B when *S. pombe* eIF2B crystal structure is compared with eIF2B/eIF2 $\alpha$ P.

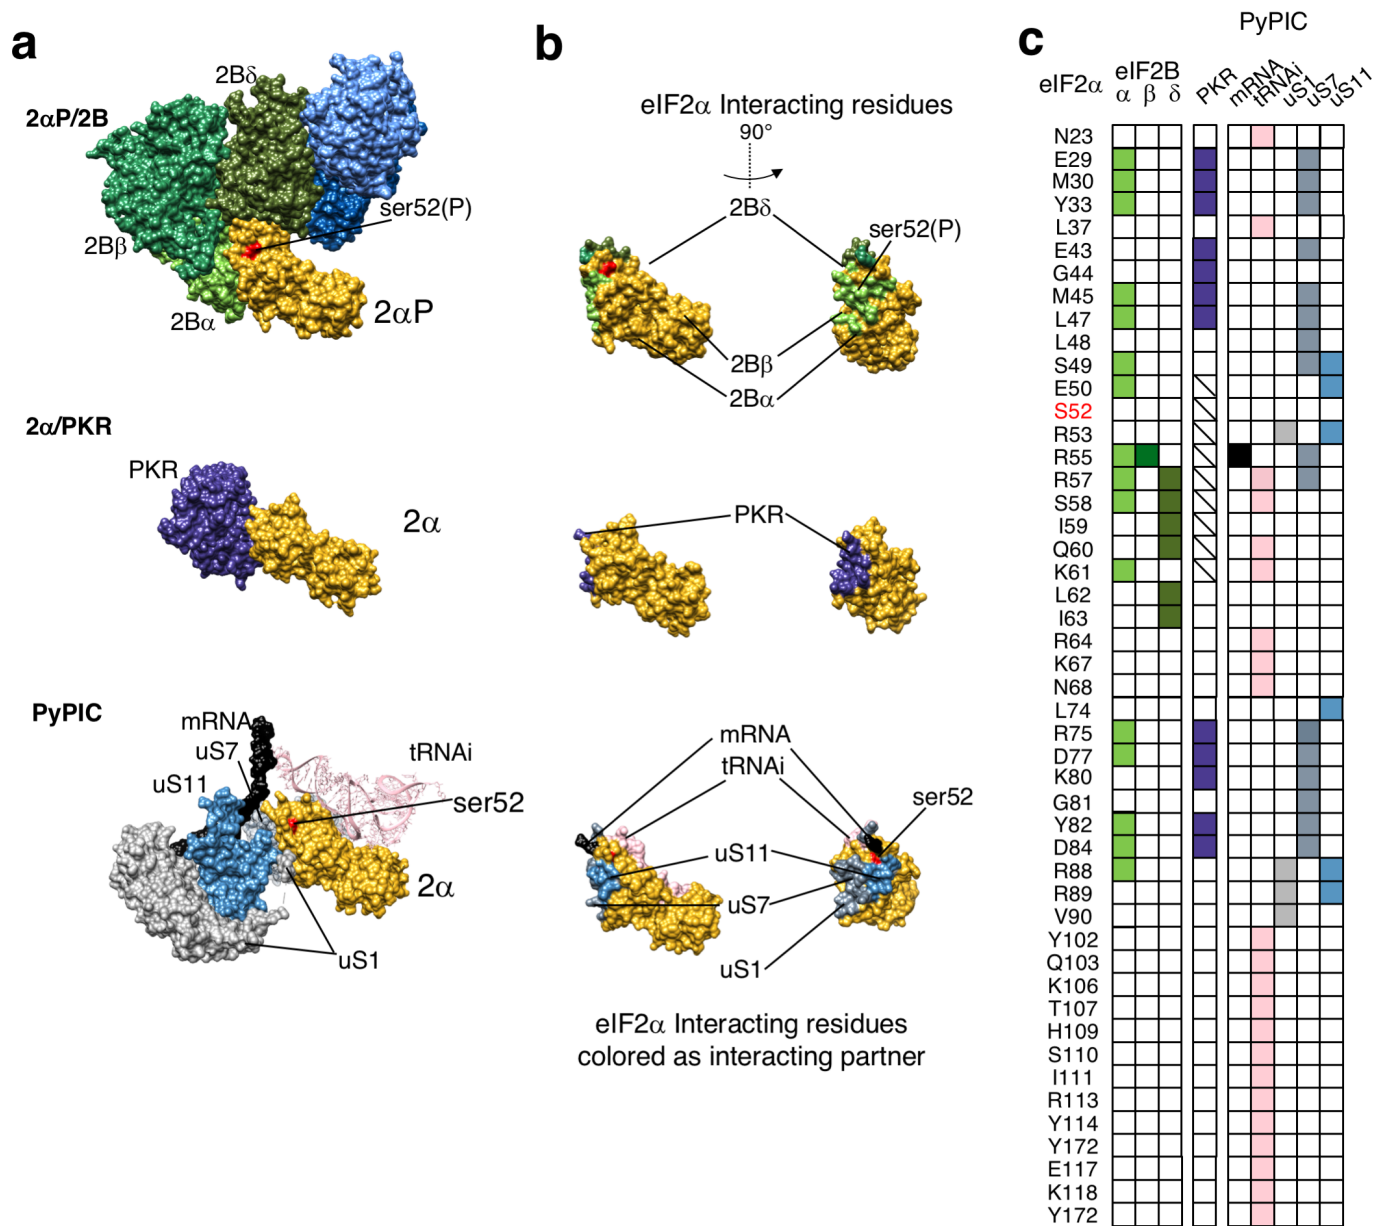

**Supplementary Figure 4. Comparison of eIF2α interactions among different structures.**

**a**, eIF2αP/eIF2B core interaction interface (top), eIF2α/PKR (PDB:2A1A, middle) and eIF2α/PyPIC interactions (PDB:3JAP, bottom).

**b**, eIF2α colored to show interacting surface residues in two orientations.

**c**, summary of eIF2α residue interactions across the three structures.

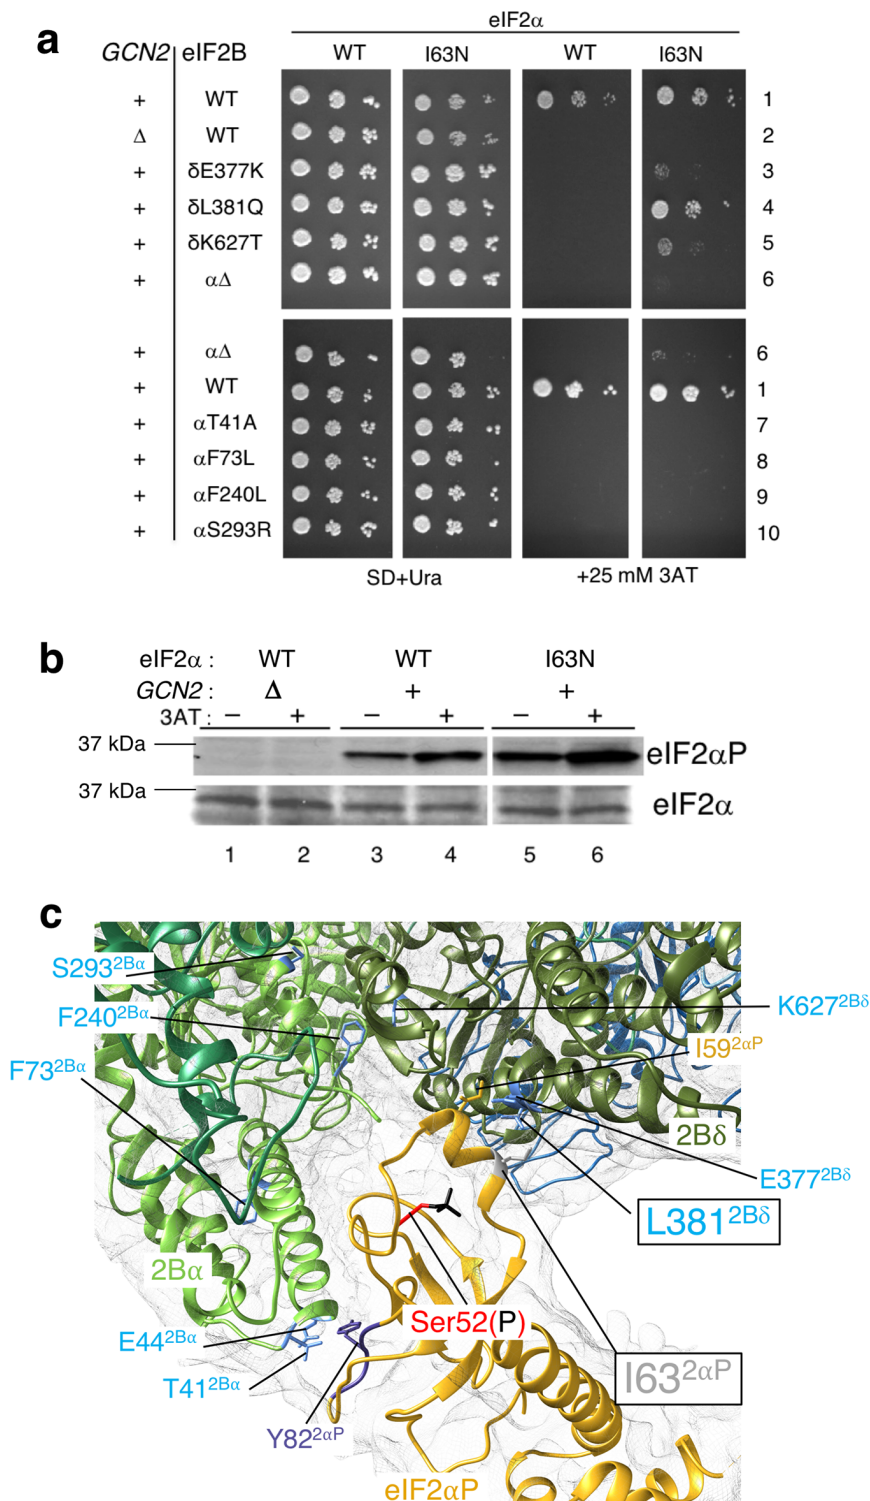

**Supplementary Figure 5. eIF2 $\alpha$ -I63N reverses the Gcn<sup>-</sup> phenotype of eIF2B $\delta$ -L381Q**

**a**, Genetic analysis. I63N in eIF2 $\alpha$  reverses Gcn<sup>-</sup> of L381Q in eIF2B $\delta$  but not other Gcn<sup>-</sup> alleles tested.

**b**, eIF2 $\alpha$  I63N is a substrate for Gcn2.

**c**, Structure shows that eIF2 $\alpha$ -I63 and eIF2B $\alpha$ -L381 are within 4.2 Å. Other labelled residues are those mutated in panel **a** or referred to in the text.



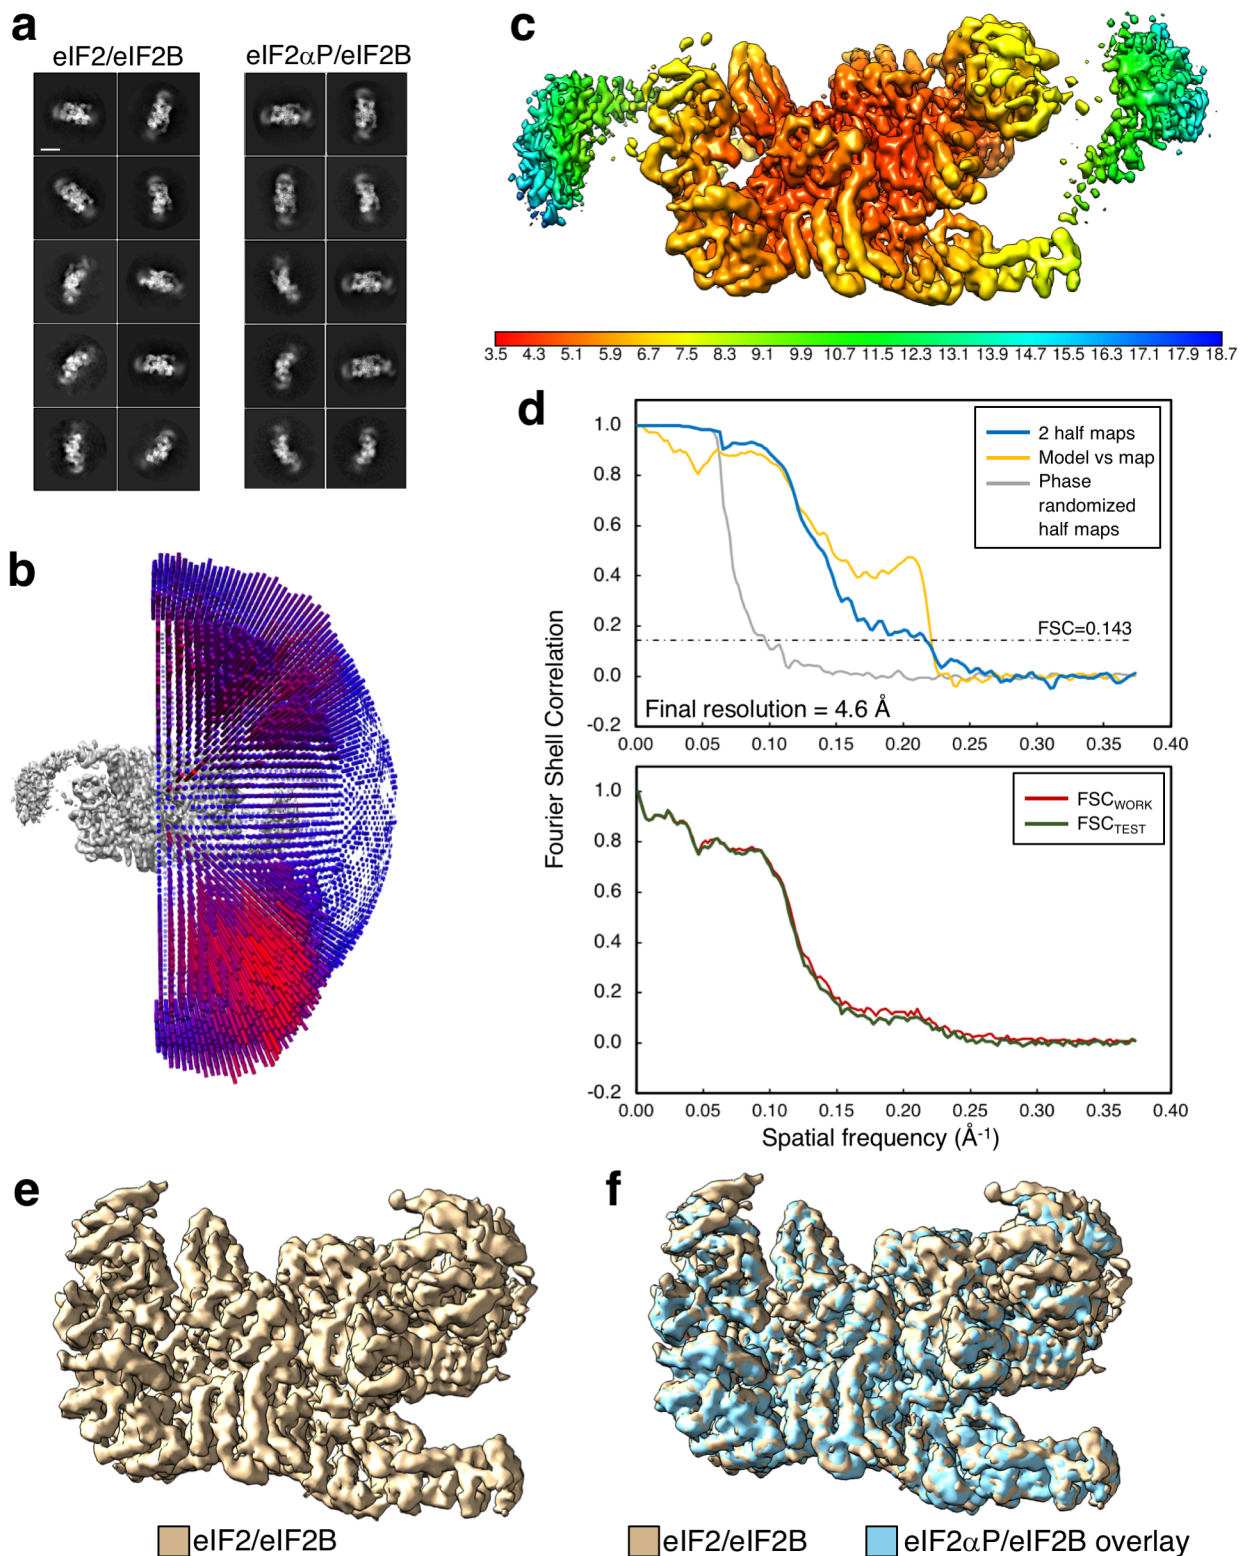

### Supplementary Figure 6. Overview of eIF2/eIF2B structure

**a**, Representative 2D classes of the eIF2/eIF2B complex (Left) alongside similar classes selected from those shown in Supplementary Figure 2b. Scale bar 100 Å.

**b**, Particle angle plot. **c**, eIF2/eIF2B Locscale map showing local resolution as a color temperature scale (Å). **d**, FSC plots for eIF2/eIF2B, as Supplementary Figure 2f.

**e**, Masked core map eIF2/eIF2B density. **f**, Overlay of masked eIF2 $\alpha$ P/eIF2B with radial Fourier amplitude profile re-scaled to match the eIF2/eIF2B map.

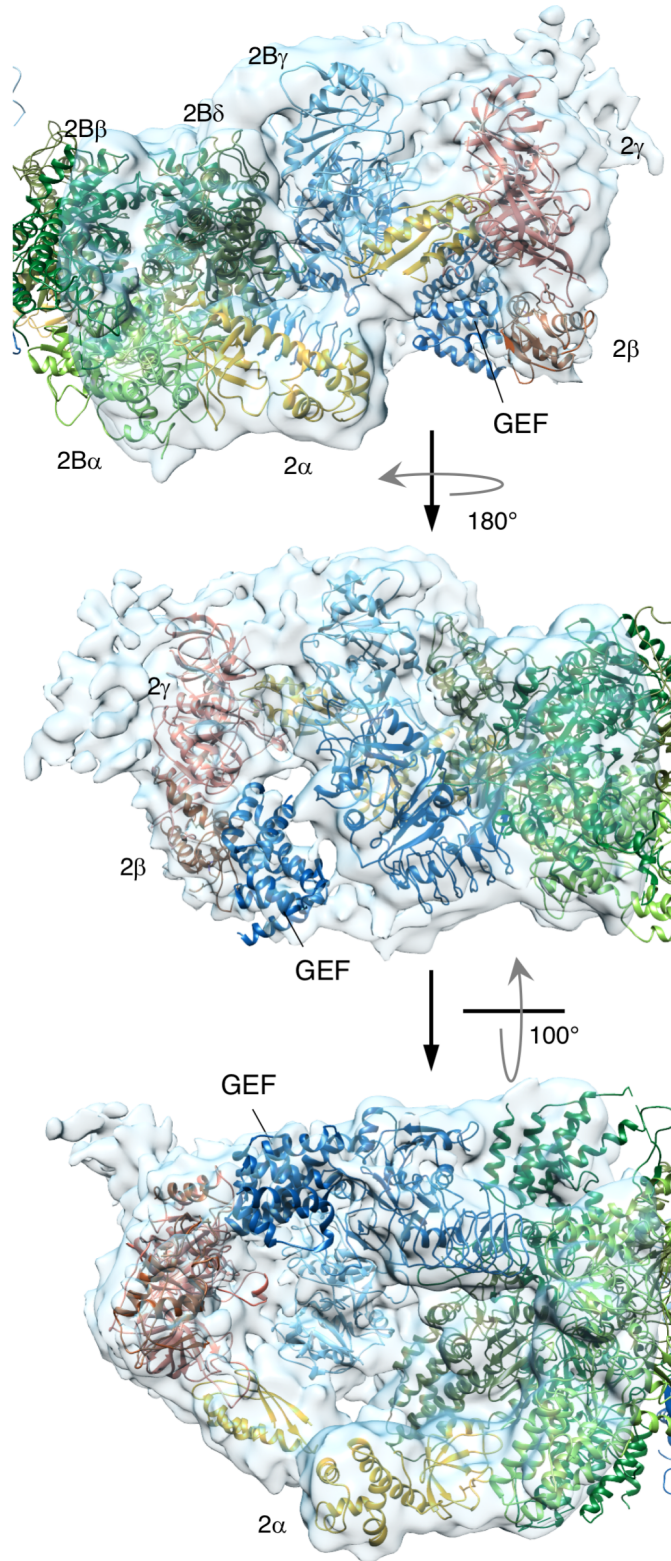

### Supplementary Figure 7. Fitting eIF2 $\beta$ and eIF2B $\epsilon$ <sup>GEF</sup>

Views of a 3D map from a particle class obtained when halves of the particles were independently classified using a localized reconstruction script described in the methods. Model coordinates from PDB files 3JAP (eIF2 $\beta$ ) and 1PAQ (eIF2B $\epsilon$ <sup>GEF</sup> domain) were fitted in the EM density.



**a**

|                             |                 | divergent surfaces<br>K3L residue clashes with 2B $\alpha$ : |            |            |            |            |                         |             |     |   |     |
|-----------------------------|-----------------|--------------------------------------------------------------|------------|------------|------------|------------|-------------------------|-------------|-----|---|-----|
|                             |                 | L81 D305                                                     |            |            |            |            |                         |             |     |   |     |
| <b>K3L</b>                  | Variola         | ----MLVFC                                                    | YSLPNVGDV  | KGKVV-ENGY | VLYVDLFDYP | HSEAILVEST | QM <del>HM</del> NRYFKY | RDKLVGKTIVK | 64  |   |     |
|                             | Buffalopox      | ----MLAFC                                                    | YLLPNAGDVI | KGRVY-ENDY | ALYIYLFDYP | HSEDLIAESV | KMHMDRYVEY              | RDKLVGKTIVK | 64  |   |     |
|                             | Vaccinia WR     | ----MLAFC                                                    | YSLPNAGDVI | KGRVY-EKDY | ALYIYLFDYP | HSEAILAESV | KMHMDRYVEY              | RDKLVGKTIVK | 64  |   |     |
|                             | Vaccinia Lister | ----MLAFC                                                    | YSLPNAGDVI | KGRVY-ENDY | ALYIYLFDYP | HSEAILAESV | KMHMDRYVEY              | RDKLVGKTIVK | 64  |   |     |
| <b>2<math>\alpha</math></b> | H.sapiens       | MPGLSCRFYQ                                                   | HKFPEVEDDV | MVNVRSLAEM | GAYVSLLEYN | NIEGMILLSE | LSRRRIRRSIN             | KLIRIGRNEC  | 70  |   |     |
|                             | S.cerevisiae    | MSTSHCRFYE                                                   | NKYPEIDDIV | MVNVQQLAEM | GAYVKLLEYD | NIEGMILLSE | LSRRRIRRSIQ             | KLIRVGKNDV  | 70  |   |     |
|                             |                 |                                                              | :          | *          | ***        | *          | :                       | :           | *:* | : | *:* |

  

|                             |                 | conserved interaction<br>surface |                         |       |       |    |    |
|-----------------------------|-----------------|----------------------------------|-------------------------|-------|-------|----|----|
| <b>K3L</b>                  | Variola         | VKIVRVDT                         | KG <del>Y</del> IDVNYKR | MCRH- | 87    |    |    |
|                             | Buffalopox      | VKIVRVDT                         | KG <del>Y</del> IDVNYKR | MRRHQ | 88    |    |    |
|                             | Vaccinia WR     | VKIVRVDT                         | KG <del>Y</del> IDVNYKR | MCRHQ | 88    |    |    |
|                             | Vaccinia Lister | VKIVRVDT                         | KG <del>Y</del> IDVNYKR | MCRHQ | 88    |    |    |
| <b>2<math>\alpha</math></b> | H.sapiens       | VVVI <del>R</del> VDKE           | KG <del>Y</del> IDLSKRR | VSPEE | 95    |    |    |
|                             | S.cerevisiae    | AVVL <del>R</del> VDKE           | KG <del>Y</del> IDLSKRR | VSSSE | 95    |    |    |
|                             |                 | .                                | ***                     | *     | ***** | .. | *: |

**b**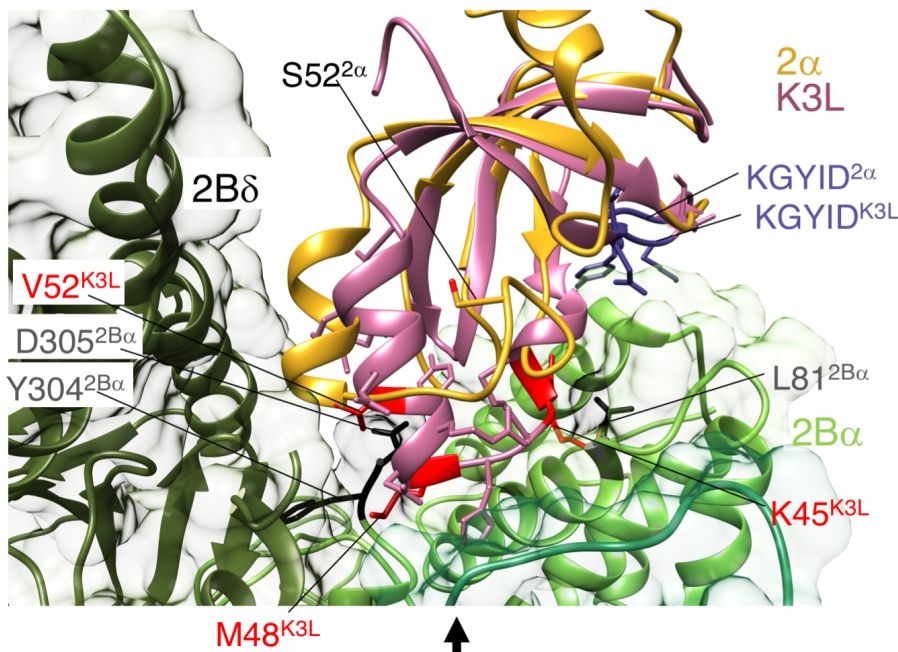**c**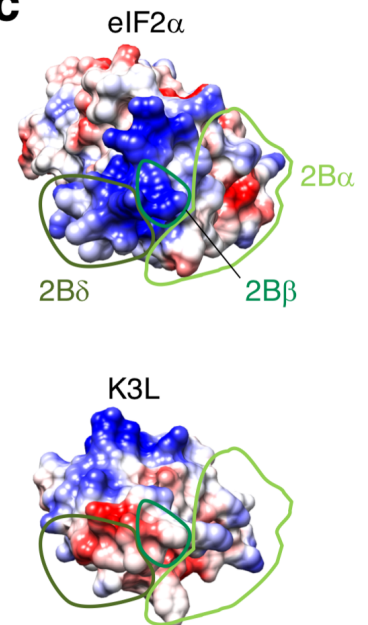

### Supplementary Figure 8. Structural specificity of viral K3L for PKR over eIF2B

**a**, Alignment of K3L and eIF2 $\alpha$  sequences. Sequence variation in K3L residues, highlighted grey. Residues colored red clash with eIF2B $\alpha$ . eIF2 $\alpha$  residues are colored by eIF2B interacting partner. K3L surface residues juxtaposed mainly to eIF2B $\delta$  have distinct properties (red box) while 'KGYID' centered surface is conserved (green box).

**b**, Superposition of K3L (PDB:1LUZ; pink) on eIF2/eIF2B reveals clashes between K3L (red) and eIF2B $\alpha$  residues (black) that should prevent K3L binding and inhibiting eIF2B.

**c**, eIF2 $\alpha$  Coulombic surface potential at the eIF2B interface (viewed from direction of arrow in **b**), with eIF2B interaction zones indicated and shown below is the equivalent K3L surface.

## Supplementary Tables

**Supplementary Table 1. Data collection and reconstruction.**

| <b>Data collection</b>                                 |                                                                          |                                                                              |                                                                               |
|--------------------------------------------------------|--------------------------------------------------------------------------|------------------------------------------------------------------------------|-------------------------------------------------------------------------------|
|                                                        | <b>eIF2<math>\alpha</math>P/eIF2B</b><br>(ultrathin carbon,<br>35° tilt) | <b>eIF2<math>\alpha</math>P/eIF2B</b><br>(ice, no tilt)                      | <b>eIF2/eIF2B</b><br>(ultrathin carbon,<br>35° tilt)                          |
| Microscope                                             | Titan Krios                                                              | Titan Krios                                                                  | Titan Krios                                                                   |
| Voltage (kV)                                           | 300                                                                      | 300                                                                          | 300                                                                           |
| Detector                                               | K2 Summit                                                                | K2 Summit                                                                    | K2 Summit                                                                     |
| Magnification (x)                                      | 37313                                                                    | 37313                                                                        | 37313                                                                         |
| Pixel size (Å)                                         | 1.34                                                                     | 1.34                                                                         | 1.34                                                                          |
| Defocus range (μm)                                     | -1.5 to -3.5                                                             | -2 to -4                                                                     | -1 to -3.0                                                                    |
| Dose (e <sup>-</sup> /Å <sup>2</sup> )                 | 40                                                                       | 30                                                                           | 34                                                                            |
| Number of frames                                       | 48                                                                       | 40                                                                           | 40, 60, 100                                                                   |
| Frame length (s)                                       | 0.25                                                                     | 0.15                                                                         | 0.35,0.23,0.14                                                                |
| Micrographs                                            | 2278                                                                     | 2255                                                                         | 2154                                                                          |
| <b>Reconstruction</b>                                  |                                                                          |                                                                              |                                                                               |
|                                                        | <b>eIF2<math>\alpha</math>P/eIF2B</b><br>(ultrathin carbon,<br>35° tilt) | <b>eIF2<math>\alpha</math>P/eIF2B</b><br>(combined)<br>EMDB-4404<br>PDB-613M | <b>eIF2/eIF2B</b><br>(ultrathin carbon,<br>35° tilt)<br>EMDB-4428<br>PDB-617T |
| Initial particle images                                | 196,242                                                                  | 50,000+42,622                                                                | 114,390                                                                       |
| Particles used for<br>final refinement                 | 42,622                                                                   | 64,541                                                                       | 23,274                                                                        |
| Symmetry imposed                                       | C2                                                                       | C2                                                                           | C2                                                                            |
| Map resolution (Å)                                     | 4.3                                                                      | 3.9                                                                          | 4.6                                                                           |
| Map resolution range<br>(Å) (in masked core<br>region) |                                                                          | 3.5-6                                                                        | 4.1-8                                                                         |
| Map resolution range<br>(Å) (whole structure)          |                                                                          | 3.5-18                                                                       | 4.1-17                                                                        |
| Fourier shell<br>correlation criterion                 | 0.143                                                                    | 0.143                                                                        | 0.143                                                                         |
| Map sharpening B-<br>factor (Å <sup>2</sup> )          | -138.1                                                                   | -118.2                                                                       | -151.4                                                                        |

**Supplementary Table 2. Residues modelled and initial templates used for the eIF2 $\alpha$ P/eIF2B complex (PDB-613M, EMDB-4404)\*\*.**

| Subunit             | Residues total | Residues modelled   | Initial template | Species              |
|---------------------|----------------|---------------------|------------------|----------------------|
| eIF2B $\alpha$      | 305            | 1-305               | 5B04A            | <i>S. pombe</i>      |
| eIF2B $\beta$       | 381            | 16-129              | 5B04C            | <i>S. pombe</i>      |
| eIF2B $\gamma$ *    | 578            | 142-381             | 5B04E            | <i>S. pombe</i>      |
|                     |                | 2-10                |                  |                      |
|                     |                | 67-88               |                  |                      |
|                     |                | 107-309             |                  |                      |
| eIF2B $\delta$      | 651            | 382-415             | 5B04G            | <i>S. pombe</i>      |
|                     |                | 247-534             |                  |                      |
| eIF2B $\varepsilon$ | 712            | 598-651             | 5B04I            | <i>S. pombe</i>      |
|                     |                | 24-433              |                  |                      |
| eIF2 $\alpha$       | 304            | 3-174               | 3JAPj            | <i>S. cerevisiae</i> |
| eIF2 $\beta$        | 285            | 182-210 (rigid fit) | 3JAPI            | <i>S. cerevisiae</i> |
|                     |                | 218-265 (rigid fit) |                  |                      |
| eIF2 $\gamma$       | 527            | 127-143 (rigid fit) | 3JAPk            | <i>S. cerevisiae</i> |
|                     |                | 98-152 (rigid fit)  |                  |                      |
|                     |                | 169-361 (rigid fit) |                  |                      |
|                     |                | 368-444 (rigid fit) |                  |                      |
|                     |                | 449-519 (rigid fit) |                  |                      |

\*majority of this subunit is modelled into lower resolution map and relied almost exclusively on homology modelling and refinement in phenix.real\_space\_refine, therefore may not be accurate

\*\* eIF2/eIF2B (PDB-617T, EMDB-4428) was refined from PDB-613M.

**Supplementary Table 3. Modelling statistics.**

|                                              | <b>eIF2<math>\alpha</math>P/eIF2B</b><br>PDB-613M<br>EMDB-4404 | <b>eIF2/eIF2B</b><br>PDB-617T<br>EMDB-4428 |
|----------------------------------------------|----------------------------------------------------------------|--------------------------------------------|
| <b>Core Only</b>                             |                                                                |                                            |
| MolProbity score                             | 1.96                                                           | 2.00                                       |
| Clashscore                                   | 6.82                                                           | 7.19                                       |
| Poor rotamers (%)                            | 0.54                                                           | 0.18                                       |
| RMS bond lengths (Å)                         | 0.0068                                                         | 0.0052                                     |
| RMS angles (degrees)                         | 1.39                                                           | 1.30                                       |
| Ramachandran favoured (%)                    | 88.72                                                          | 87.64                                      |
| Ramachandran allowed (%)                     | 11.38                                                          | 12.25                                      |
| Ramachandran disallowed (%)                  | 0.00                                                           | 0.11                                       |
| <br>                                         |                                                                |                                            |
| Model resolution (Å)                         | 3.9                                                            | 4.5                                        |
| Model resolution range (Å)                   | 3.5-6                                                          | 4.1-8                                      |
| Fourier shell correlation criterion          | 0.143                                                          | 0.143                                      |
| Total non-hydrogen atoms directly modelled   | 29,486                                                         | 29,478                                     |
| <br>                                         |                                                                |                                            |
| Total of residues directly modelled          | 3,702                                                          | 3,702                                      |
| <b>Final Model (incl rigid body docking)</b> |                                                                |                                            |
| Total non-hydrogen atoms modelled            | 37,012                                                         | 37,004                                     |
| Total residues modelled                      | 4,682                                                          | 4,682                                      |

**Supplementary Table 4. RMSD similarity between eIF2 $\alpha$  domains 1 and 2 in the eIF2 $\alpha$ P/eIF2B structure and other eIF2 $\alpha$  containing PDB entries**

| eIF2 $\alpha$<br>chain<br>compared*     | <i>S. cer</i><br>eIF2 $\alpha$ P/<br>eIF2B | <i>S. cer</i><br>eIF2/<br>eIF2B | <i>S. cer</i><br>1Q46 | <i>S. cer</i><br>3JAP-j | <i>S. cer</i><br>3JAQ-j | <i>S. cer</i><br>3J81-j | human<br>6FEC-P | rabbit<br>5K0Y-P | residues<br>aligned |
|-----------------------------------------|--------------------------------------------|---------------------------------|-----------------------|-------------------------|-------------------------|-------------------------|-----------------|------------------|---------------------|
| <u>Residues 3-173 (domains 1 and 2)</u> |                                            |                                 |                       |                         |                         |                         |                 |                  |                     |
| eIF2 $\alpha$ P/eIF2B                   | 0                                          | 0.803                           | 1.416                 | 1.452                   | 1.897                   | 1.980                   | 2.546           | 2.496            | 149                 |
| consensus                               | 1.049                                      | 1.188                           | 1.248                 | 1.248                   | 1.304                   | 1.448                   | 1.853           | 1.827            | 149                 |
| 1Q46                                    | 1.416                                      | 1.612                           | 0                     | 1.629                   | 1.765                   | 2.181                   | 2.542           | 2.656            | 149                 |
| <u>Residues 3-88 (domain 1 only)</u>    |                                            |                                 |                       |                         |                         |                         |                 |                  |                     |
| eIF2 $\alpha$ P/eIF2B                   | 0                                          | 0.509                           | 1.393                 | 1.542                   | 1.627                   | 1.624                   | 2.166           | 2.063            | 75                  |
| consensus                               | 0.983                                      | 0.950                           | 1.075                 | 1.170                   | 1.123                   | 1.036                   | 1.477           | 1.472            | 75                  |
| 1Q46                                    | 1.393                                      | 1.349                           | 0                     | 1.759                   | 1.670                   | 1.676                   | 2.001           | 1.967            | 75                  |

\* RMSD differences (Å) when compared with these reference structures

**Supplementary Table 5. Similarity between eIF2B in the eIF2 $\alpha$ P/eIF2B structure and other eIF2B decamer structures**

| <b>Per subunit RMSD (Å)</b> |                                                         |                                     |                                 |                       |                       |  |
|-----------------------------|---------------------------------------------------------|-------------------------------------|---------------------------------|-----------------------|-----------------------|--|
| <b>eIF2B chain</b>          | <b><i>S. cer</i><br/>eIF2<math>\alpha</math>P/eIF2B</b> | <b><i>S. cer</i><br/>eIF2/eIF2B</b> | <b><i>S. pombe</i><br/>5B04</b> | <b>human<br/>6CAJ</b> | <b>human<br/>6EZO</b> |  |
| alpha                       | 0                                                       | 0.573                               | 1.569                           | 1.396                 | 1.335                 |  |
| beta                        | 0                                                       | 0.601                               | 1.323                           | 1.570                 | 1.637                 |  |
| gamma                       | 0                                                       | 1.002                               | 2.573                           | 2.542                 | 2.656                 |  |
| delta                       | 0                                                       | 0.638                               | 1.470                           | 1.588                 | 1.693                 |  |
| epsilon                     | 0                                                       | 0.630                               | 1.490                           | 1.490                 | 1.497                 |  |

  

| <b>Sequence Identity</b> |                                                         |                                     |                                 |                       |                       |  |
|--------------------------|---------------------------------------------------------|-------------------------------------|---------------------------------|-----------------------|-----------------------|--|
| <b>chain</b>             | <b><i>S. cer</i><br/>eIF2<math>\alpha</math>P/eIF2B</b> | <b><i>S. cer</i><br/>eIF2/eIF2B</b> | <b><i>S. pombe</i><br/>5B04</b> | <b>human<br/>6CAJ</b> | <b>human<br/>6EZO</b> |  |
| alpha                    | 1                                                       | 1                                   | 0.484                           | 0.445                 | 0.453                 |  |
| beta                     | 1                                                       | 1                                   | 0.445                           | 0.365                 | 0.368                 |  |
| gamma                    | 1                                                       | 1                                   | 0.296                           | 0.180                 | 0.214                 |  |
| delta                    | 1                                                       | 1                                   | 0.447                           | 0.425                 | 0.399                 |  |
| epsilon                  | 1                                                       | 1                                   | 0.507                           | 0.345                 | 0.326                 |  |

  

| <b>No. aa in structure</b> |                                                         |                                     |                                 |                       |                       |                                               |
|----------------------------|---------------------------------------------------------|-------------------------------------|---------------------------------|-----------------------|-----------------------|-----------------------------------------------|
| <b>chain</b>               | <b><i>S. cer</i><br/>eIF2<math>\alpha</math>P/eIF2B</b> | <b><i>S. cer</i><br/>eIF2/eIF2B</b> | <b><i>S. pombe</i><br/>5B04</b> | <b>human<br/>6CAJ</b> | <b>human<br/>6EZO</b> | <b>C<math>\alpha</math> atoms<br/>aligned</b> |
| alpha                      | 305                                                     | 305                                 | 317                             | 265                   | 280                   | 254                                           |
| beta                       | 354                                                     | 354                                 | 349                             | 318                   | 307                   | 299                                           |
| gamma                      | 268                                                     | 268                                 | 384                             | 244                   | 347                   | 206                                           |
| delta                      | 342                                                     | 342                                 | 349                             | 357                   | 355                   | 318                                           |
| epsilon                    | 410                                                     | 410                                 | 428                             | 421                   | 396                   | 377                                           |



## Supplementary Discussion

### Comparison of our eIF2/eIF2B structures with cross-linking data and other recent structures.

Kashiwagi et al., 2016 published an extensive series of protein-protein interaction cross-links between specific eIF2B subunit residues and eIF2 and *vice versa* using *S. pombe* proteins. These data showed cross-links between eIF2 $\alpha$  and eIF2B $\alpha$ , 2B $\beta$  and 2B $\delta$  and between eIF2 $\gamma$  and eIF2B $\gamma$  and eIF2B $\epsilon$ <sup>1</sup>. By reciprocal labelling of specific residues in one binding partner, they built a picture of the interaction interfaces between eIF2 and eIF2B. In large agreement with our structures, their data showed that the cross-links were largely unchanged by the phosphorylation of eIF2 $\alpha$  at serine 52<sup>1</sup>.

All eIF2B $\alpha\beta\delta$  cross-links examined (bar two eIF2B $\beta$  positions) were found unaffected by loss of phosphate from eIF2 $\alpha$ P. In our structures the eIF2B $\beta$  density is weaker and contributes less to the interaction interface (Supplementary Figure 4c). Reciprocal cross-links identified between labelled eIF2 $\alpha$  and eIF2B $\alpha$  are also consistent with our structures. However, the reciprocal eIF2 $\alpha$ -eIF2B $\beta$  cross-links are not<sup>1</sup>. For example *S. pombe* eIF2 $\alpha$ -R88 cross-links to both eIF2B $\alpha$  and eIF2B $\beta$ . In our structures the equivalent residue (eIF2 $\alpha$ -R89) is close to eIF2B $\alpha$ , but not eIF2B $\beta$  (Supplementary Figure 4c; see also paragraph below). The cross-links between eIF2B $\gamma$  or eIF2B $\epsilon$  and eIF2 $\gamma$  are also largely unchanged by eIF2 $\alpha$ P, where both forms were analysed and are consistent with our structure<sup>1</sup>. Our resolution of eIF2 $\gamma$  is poor, because eIF2 $\gamma$  can adopt multiple positions (Figure 2). This limits detailed comparison between specific cross-links and our structure. Our structures place eIF2 $\gamma$  closer to eIF2B $\gamma$  than eIF2B $\epsilon$ . Interestingly, the *S. pombe* cross-links between eIF2B $\gamma$ S258 and eIF2 $\gamma$  were stronger than those between the eIF2B $\epsilon$  positions analysed and eIF2 $\gamma$ <sup>1</sup>. These comparisons suggest that our structures are consistent with the majority of cross-links previously described.

Concurrent independent studies have also determined the structures of eIF2B bound to eIF2 and for which pre-prints are deposited in BioRxiv<sup>2-4</sup>. Each study performs a range of complementary experiments. All are broadly agreed in how eIF2B interacts with phosphorylated eIF2 via the eIF2 $\alpha$ -eIF2B $\alpha/\delta/\beta$  interface. One study additionally shows binding of *S. pombe* eIF2B to unphosphorylated eIF2 $\alpha$  from *S. cerevisiae* in an identical

position to our study<sup>4</sup>. In contrast, two studies show human eIF2 interacting with human eIF2B at a different site where eIF2 $\alpha$  is bound between eIF2B $\beta$  and eIF2B $\delta$  and not via eIF2B $\alpha$ <sup>3,4</sup>. Although we do not have evidence for this conformation in our cryoEM images, the binding mode described does appear consistent with the prior eIF2B $\beta$  cross-link to *S. pombe* eIF2 $\alpha$ -R88 discussed above, that is not in common with our structure. The alternative binding site would not be expected to allow the cross-links seen to eIF2B $\alpha$ . Taken together the data suggest that two alternative binding modes between eIF2 and eIF2B may be possible. The implications of this for GEF activity and regulation in the ISR are not yet clear and will merit further study.

### Supplementary References

1. Kashiwagi, K. et al. Crystal structure of eukaryotic translation initiation factor 2B. *Nature* **531**, 122-125 (2016).
2. Gordiyenko, Y., Llacer, J.L. & Ramakrishnan, V. Structural basis for the inhibition of translation through eIF2 $\alpha$  phosphorylation. Preprint at <http://dx.doi.org/10.1101/503979> (2018).
3. Anand, A.A. et al. Structural basis of eIF2B-catalyzed GDP exchange and phosphoregulation by the integrated stress response. Preprint at <http://dx.doi.org/10.1101/504654> (2018).
4. Kashiwagi, K. et al. Structural Basis for eIF2B Inhibition in Integrated Stress Response. Preprint at <http://dx.doi.org/10.1101/503540> (2018).
